# Supplementary material
Source: ML conference proceedings conference paper supplement (https://proceedings.neurips.cc/paper_files/paper/2019/hash/2ca65f58e35d9ad45bf7f3ae5cfd08f1-Abstract.html)
Supplement: Supplementary file [file 2ca65f58e35d9ad45bf7f3ae5cfd08f1-Supplemental.zip]

## A ATMC combined with different adversarial training methods

While we used PGD attack mainly because it is state-of-the-art, ATMC is certainly compatible with different adversarial training methods. We hereby provide results when using WRM with the same hyper-parameter settings in Section 3.3 for all training and testing. We show results with respect to the pruning ratios (PRs) (e.g, by controlling  $k$  only in Equation 4). Note that for AP,  $A\ell_0$  and ATMC, PRs equal standard compression ratios (CRs) if there is no quantization. Hence importantly, for ATMC-8bits, it has **only  $\frac{1}{4}$  model size** compared to AP,  $A\ell_0$  and ATMC-32bits, when they have the same PRs. The results are shown in Table 2.

Table 2: Results for WRM adversarial training and testing

| Pruning Ratio |             | 0.1           | 0.05          | 0.001         |
|---------------|-------------|---------------|---------------|---------------|
| TA            | AP          | 0.9145        | 0.9117        | 0.7878        |
|               | $A\ell_0$   | 0.9117        | 0.9103        | 0.8206        |
|               | ATMC-32bits | <b>0.9156</b> | <b>0.9095</b> | <b>0.8284</b> |
|               | ATMC-8bits  | 0.9004        | 0.9019        | 0.8109        |
| ATA           | AP          | 0.8271        | 0.8190        | 0.6952        |
|               | $A\ell_0$   | 0.8250        | 0.8175        | 0.7262        |
|               | ATMC-32bits | <b>0.8331</b> | <b>0.8289</b> | <b>0.7311</b> |
|               | ATMC-8bits  | 0.8112        | 0.7996        | 0.7144        |

The advantage of ATMC also persists for different  $\epsilon$  in PGD adversarial training. For example, if we change  $\epsilon$  to 8 on CIFAR-10 dataset for both adversarial training and testing, while keeping other settings untouched, results would be like Table 3.

Table 3: Results for PGD ( $\epsilon = 8$ ) adversarial training and testing

| Pruning Ratio |             | 0.005         | 0.003         | 0.001         |
|---------------|-------------|---------------|---------------|---------------|
| TA            | AP          | 0.7296        | 0.6905        | 0.5510        |
|               | $A\ell_0$   | 0.7563        | 0.7169        | 0.5564        |
|               | ATMC-32bits | <b>0.7569</b> | <b>0.7219</b> | <b>0.5678</b> |
|               | ATMC-8bits  | 0.7486        | 0.7168        | 0.5588        |
| ATA           | AP          | 0.4569        | 0.4247        | 0.3398        |
|               | $A\ell_0$   | 0.4813        | 0.4559        | 0.3532        |
|               | ATMC-32bits | <b>0.4875</b> | <b>0.4645</b> | <b>0.3608</b> |
|               | ATMC-8bits  | 0.481         | 0.4486        | 0.3529        |

## B ATMC quantization vs traditional quantization

ATMC jointly learn pruning and non-uniform quantization though ADMM algorithm. To further show its advantage, we compare ATMC-8bits with another baseline, that first applies ATMC-32bits and then quantizes to 8 bits using standard uniform quantization as post-processing (denoted as ATMC-8bits-uniform). The results on SVHN are shown in Table 4.

Table 4: ATMC quantization vs traditional quantization

| Pruning Ratio |                    | 0.01          | 0.001         |
|---------------|--------------------|---------------|---------------|
| TA            | ATMC-8bits         | <b>0.9336</b> | <b>0.7749</b> |
|               | ATMC-8bits-uniform | 0.9311        | 0.7239        |
| ATA           | ATMC-8bits         | <b>0.6954</b> | <b>0.4028</b> |
|               | ATMC-8bits-uniform | 0.6855        | 0.3533        |

## C Experiments for larger Neural Networks

We present results with CIFAR-10 on ResNet101 [60] in Table 5. Other experimental settings are identical with Section 3.1.

Table 5: Results on ResNet101

| Pruning Ratio |              | 0.005         | 0.001         | 0.0008        |
|---------------|--------------|---------------|---------------|---------------|
| TA            | AP           | 0.8543        | 0.6232        | 0.5599        |
|               | $A_{\ell_0}$ | 0.8621        | 0.6750        | 0.6424        |
|               | ATMC-32bits  | <b>0.8796</b> | <b>0.7345</b> | <b>0.7110</b> |
| ATA           | AP           | 0.5964        | 0.3859        | 0.3254        |
|               | $A_{\ell_0}$ | 0.6124        | 0.4263        | 0.4024        |
|               | ATMC-32bits  | <b>0.6219</b> | <b>0.4477</b> | <b>0.4347</b> |
